# Supplementary material
Source: ML conference proceedings conference paper supplement (https://openreview.net/forum?id=Qe_de8HpWK)

To justify our method we tested on multiple IBM-Q sites including Vigo, Ourense, Rome, Bogota and Valencia. Image One_Qubit_Measurement is the setup for Kernel method showed below. We ran this circuit with 40 shots ( repetition) 20 times on different locations and got accuracy of 100% .

We also tested MNIST dataset train on 913 samples on different locations to justify our founding. Image MNIST_Two_Qubit_t1 to t3 shows a sample of each iteration over actual IBM-Q machine which ran for 913 times to get accuracy of 95% on average.

For last test we tested one qubit classification against the random data based on rotation from 2-d dimension to quantum space.
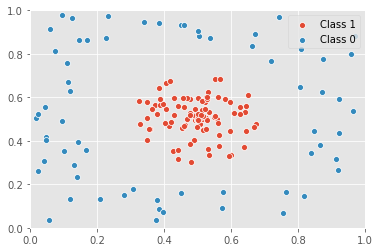

Supplement: supplementary_material [file attachment]
